# Supplementary material for: A readily prepared neutral heterobimetallic titanium(iv)–rhodium(i) catalyst for intramolecular hydroacylation
Source: Royal Society of Chemistry journal article supplement (doi:10.1039/b504195c), 2005-01-01
Supplement: b504195c.pdf [file b504195c.pdf]

## Supplementary data

# A readily prepared neutral heterobimetallic titanium(IV)-rhodium(I) catalyst for intramolecular hydroacylation

*John P. Morgan,\* Kousik Kundu and Michael P. Doyle*

Department of Chemistry and Biochemistry, College of Life Sciences, The University of  
Maryland, College Park, MD 20742

## Supporting Information

### Experimental Section

*General.* All manipulations were performed using standard Schlenk techniques. Deuterated dichloromethane was dried over activated 3A molecular sieves prior to use. All other chemicals were used as obtained from Strem or Aldrich Chemicals. The ligand  $\text{HO}(\text{CMe}_2\text{CH}_2)_2\text{PPh}_2$ , compound **10**, was synthesized according to literature procedures.<sup>1</sup> Compounds **1** and **8** were prepared and their hydroacylation behavior was monitored as previously described.<sup>2</sup>  $^1\text{H}$ ,  $^{13}\text{C}$ , and  $^{31}\text{P}\{^1\text{H}\}$  NMR spectra were obtained on a Bruker

---

<sup>1</sup> Ferguson, G. S.; Wolczanski, P. T.; *J. Am. Chem. Soc.* **1986**, *108*, 8293-8295.

<sup>2</sup> (a) Barnhardt, R. W.; Bosnich, B. *Organometallics* **1994**, *13*, 4131-4133. (b) Fairlie, D. P.; Bosnich, B. *Organometallics* **1988**, *7*, 936-945.

DRX or AMX 400 instrument, and chemical shifts are reported in parts per million (ppm,  $\delta$ ) from Me<sub>4</sub>Si (TMS, for <sup>1</sup>H), from residual solvent (CD<sub>2</sub>Cl<sub>2</sub>,  $\delta$  45.00 for <sup>13</sup>C), or from H<sub>3</sub>PO<sub>4</sub> (for <sup>31</sup>P) standards. Mass spectra were recorded using fast atom bombardment (FAB) on a JEOL SX102a instrument.

In situ *preparation of (iPrO)Ti(μ: η<sup>1</sup>, η<sup>1</sup>-OCMe<sub>2</sub>CH<sub>2</sub>PPh<sub>2</sub>)<sub>3</sub>RhCl (14)*. To a flame dried NMR tube equipped with Teflon stopcock was added HOCMe<sub>2</sub>CH<sub>2</sub>PPh<sub>2</sub> **10** (5.4 mg, 21 μmol, 3 eq.) in 0.5 mL CD<sub>2</sub>Cl<sub>2</sub>. Titanium tetraisopropoxide (2 mg, 7 μmol, 1 eq.) was subsequently added by microsyringe, resulting in an immediate color change from colorless to a pale yellow color (<sup>31</sup>P{<sup>1</sup>H} NMR (CD<sub>2</sub>Cl<sub>2</sub>, 162 MHz): -23.38 ppm (s)). The solution was gently mixed for 0.5 hr. A solution of *bis*-(cyclooctadienylrhodium(I) chloride) (2 mg, 4 μmol, 1.1 eq.) in CD<sub>2</sub>Cl<sub>2</sub> (0.2 mL) was then added to the NMR tube, and the reaction mixture turned pale brown-yellow over the next 10 minutes. After 0.5 hr, the pentenal substrate (**1** or **8**, 70 μmol) was added via microsyringe to start the hydroacylation reaction. <sup>1</sup>H NMR (CD<sub>2</sub>Cl<sub>2</sub>, 400 MHz):  $\delta$  7.81 (comp, 10H, Ph), 6.83 (comp, 20 H, Ph), 5.83 (d, *J* = 10 Hz, 1H), 5.47 (dd, *J* = 4, 10 Hz, 1H), 4.37 (s, 12H), 3.72 (m, *J* = 6 Hz, 1 H, iPr), 2.26 (d, *J* = 10 Hz, 1 H), 2.04 (br s, 2 H), 1.52 (comp, 2 H), 1.43 (s, 1H), 1.34 (comp, 3 H), 1.20 (s, 1 H), 1.06 (d, *J* = 6.4 Hz, 4 H), 0.97 (d, *J* = 6 Hz, 10 H, Me). <sup>13</sup>C NMR (CD<sub>2</sub>Cl<sub>2</sub>, 100.6 MHz): 135.5, 134.5, 132.9, 132.3, 130.9, 130.8, 129.4, 129.3, 129.2, 128.6, 71.3, 41.9, 41.2, 32.0, 31.9, 28.6. <sup>31</sup>P{<sup>1</sup>H} NMR (CD<sub>2</sub>Cl<sub>2</sub>, 162.0 MHz):  $\delta$  18.194 (d, *J*<sub>RhP</sub> = 147 Hz). Mass spectrum (FAB, *m/z*): 956.6 ([M - OiPr]<sup>+</sup>), 877.6, 782.7, 652.8, 619.4, 455.3, 407.2, 275.3, 201.2, 132.9, 85.0, 41.0.

*General Procedure for Rhodium(I)-diphosphine in situ catalyst synthesis.* The following procedure is adapted from that reported by Sakai, et al.:<sup>3</sup> To a flame-dried NMR tube equipped with Teflon stopcock was added ligand (triphos, R-(+)-BINAP, *S,S*-(+)-DIOP, or *R,R*-(+)-BDPP: 35  $\mu\text{mol}$ ) in  $\text{C}_6\text{D}_6$  or  $\text{CD}_2\text{Cl}_2$  (0.5 mL). A solution of *bis*-(cyclooctadienerrhodium(I) chloride) (3.2 mg, 3  $\mu\text{mol}$ ) in  $\text{C}_6\text{D}_6$  or  $\text{CD}_2\text{Cl}_2$  (0.2 mL) was added by flame-dried pipet. The reaction was sealed under nitrogen for 1 hour (a color change to orange yellow was noted, except for the triphos case, in which the reaction mixture instantaneously became yellowish brown). Substrate **1** (15  $\mu\text{mol}$ ) was then added by microsyringe to start the hydroacylation reaction.

---

<sup>3</sup> Taura, Y.; Tanaka, M.; Wu, X. M.; Funakoshi, K.; Sakai, K. *Tetrahedron* **1991**, 47, 4879-48888.

**Compound 10, Ligand HOCMe<sub>2</sub>CH<sub>2</sub>PPh<sub>2</sub>, <sup>31</sup>P NMR, 162 MHz, CD<sub>2</sub>Cl<sub>2</sub>.**

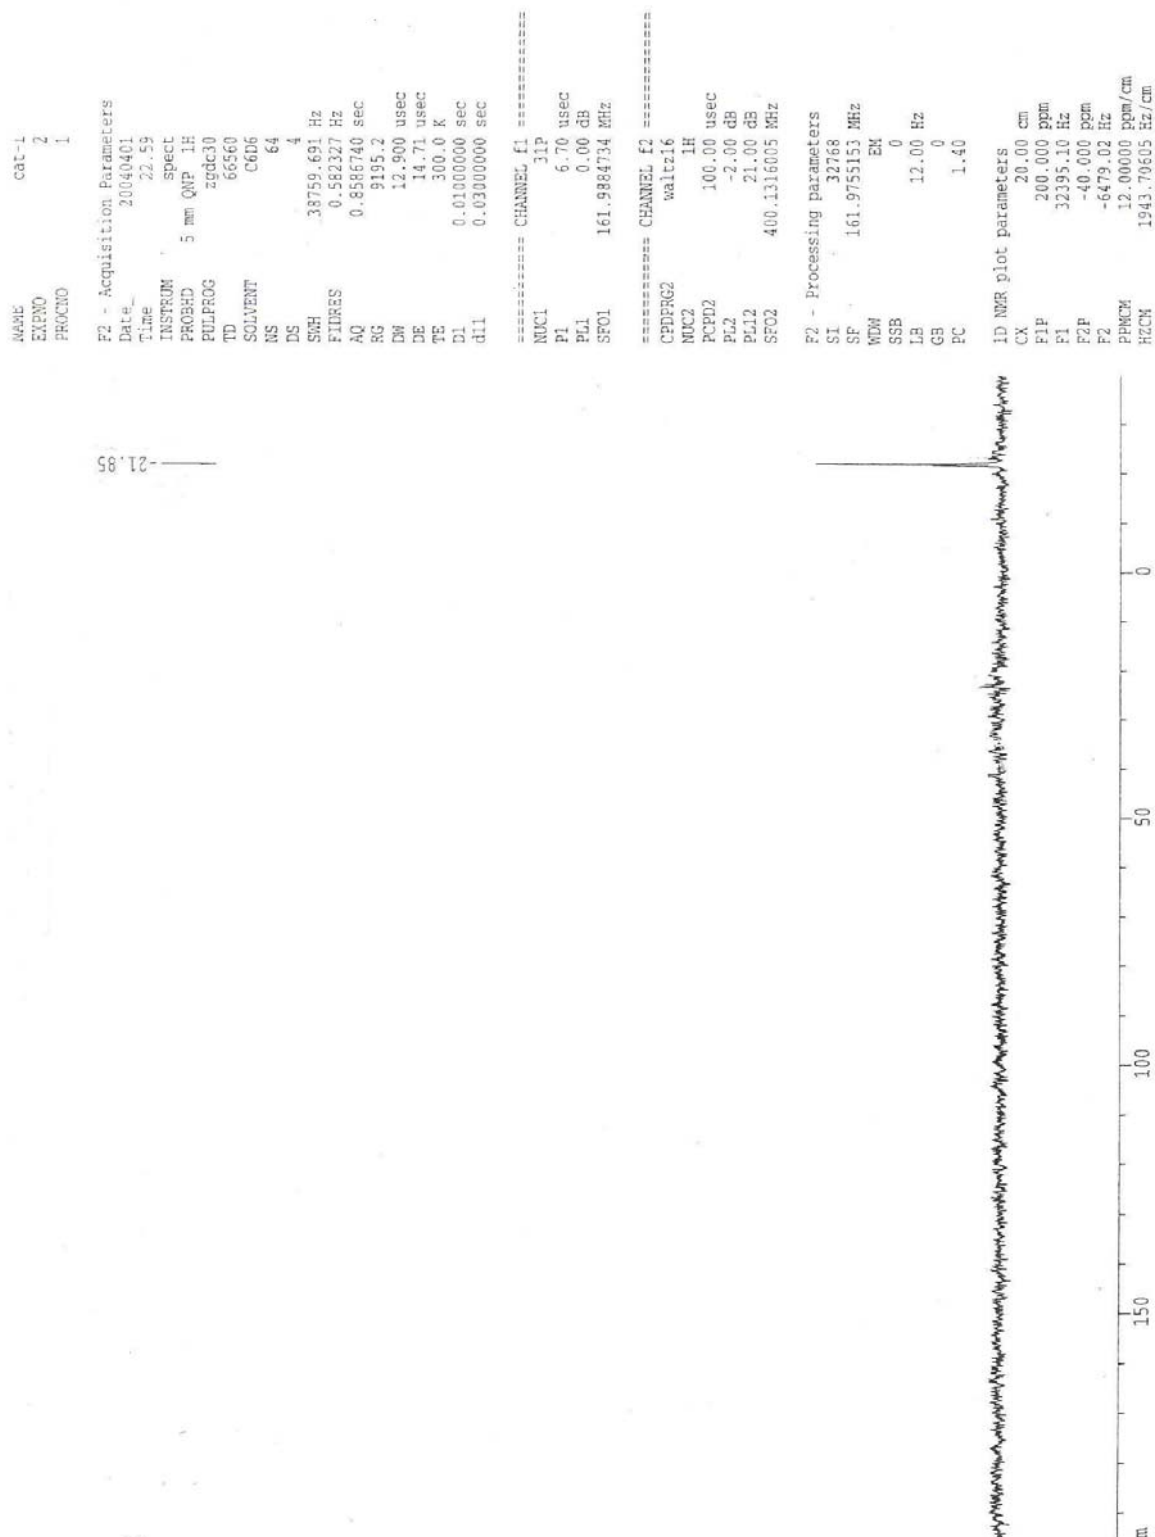

**Compound 12, Ti(OiPr)(OCMe<sub>2</sub>CH<sub>2</sub>PPh<sub>2</sub>)<sub>3</sub>, <sup>31</sup>P NMR, 162 MHz, CD<sub>2</sub>Cl<sub>2</sub>.**

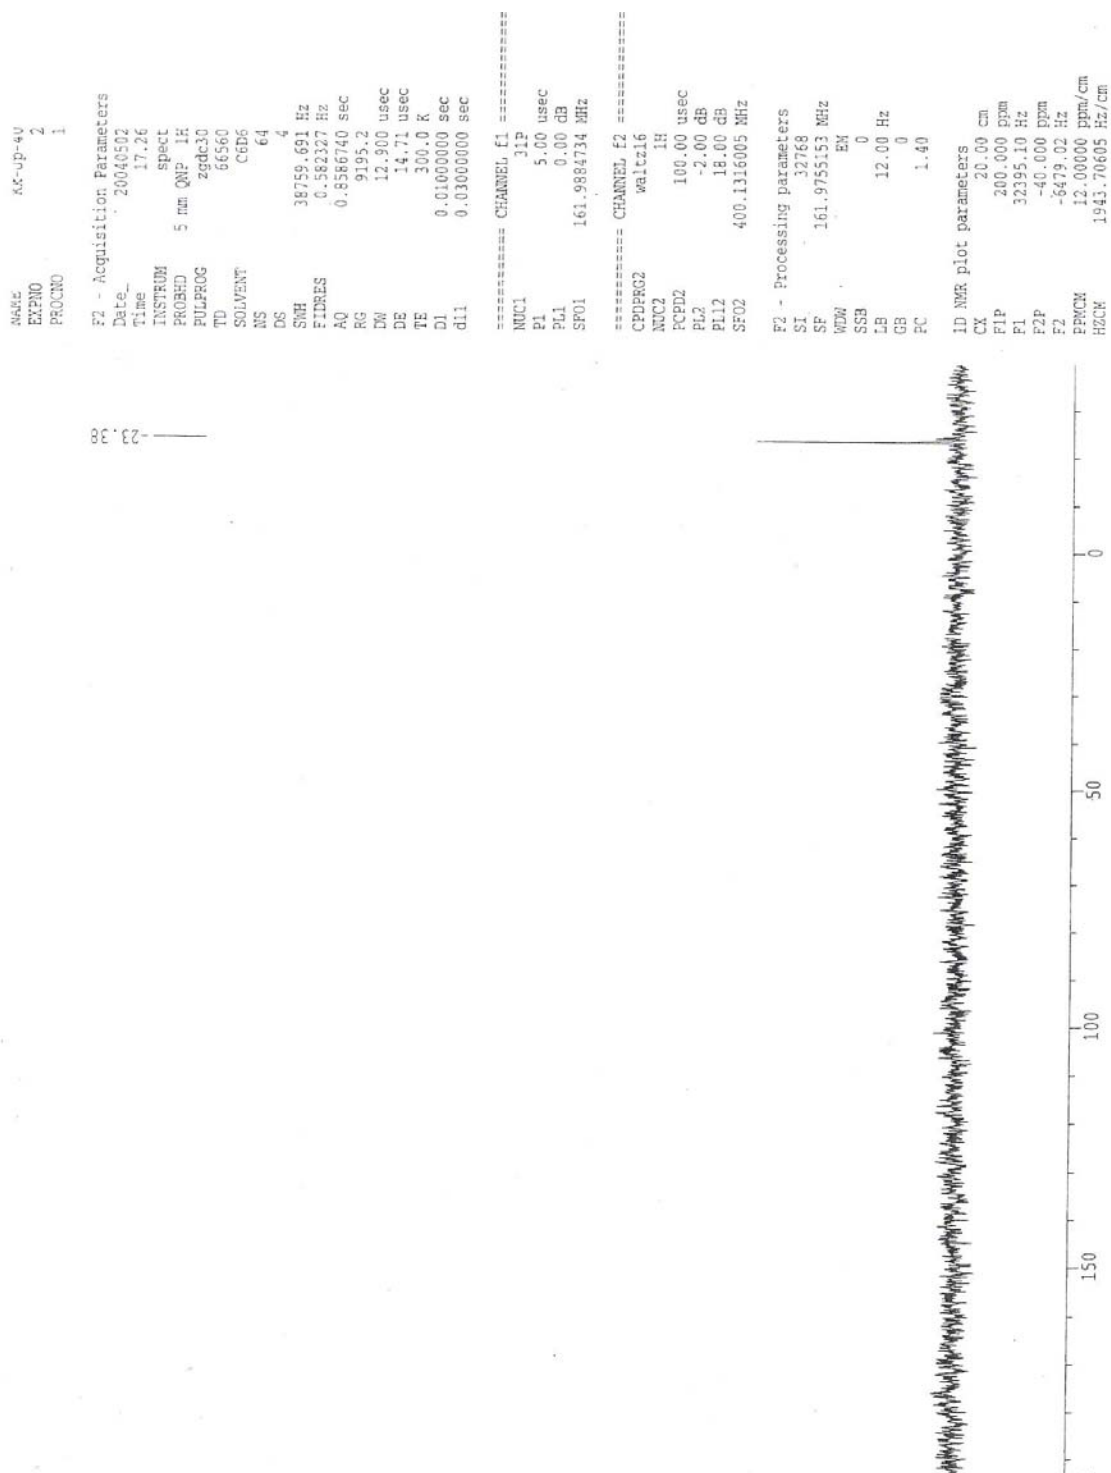

**Compound 14, (iPrO)Ti( $\mu$ : $\eta^1, \eta^1$ -OCMe<sub>2</sub>CH<sub>2</sub>PPh<sub>2</sub>)<sub>3</sub>RhCl, <sup>31</sup>P NMR, 162 MHz,  
CD<sub>2</sub>Cl<sub>2</sub>.**

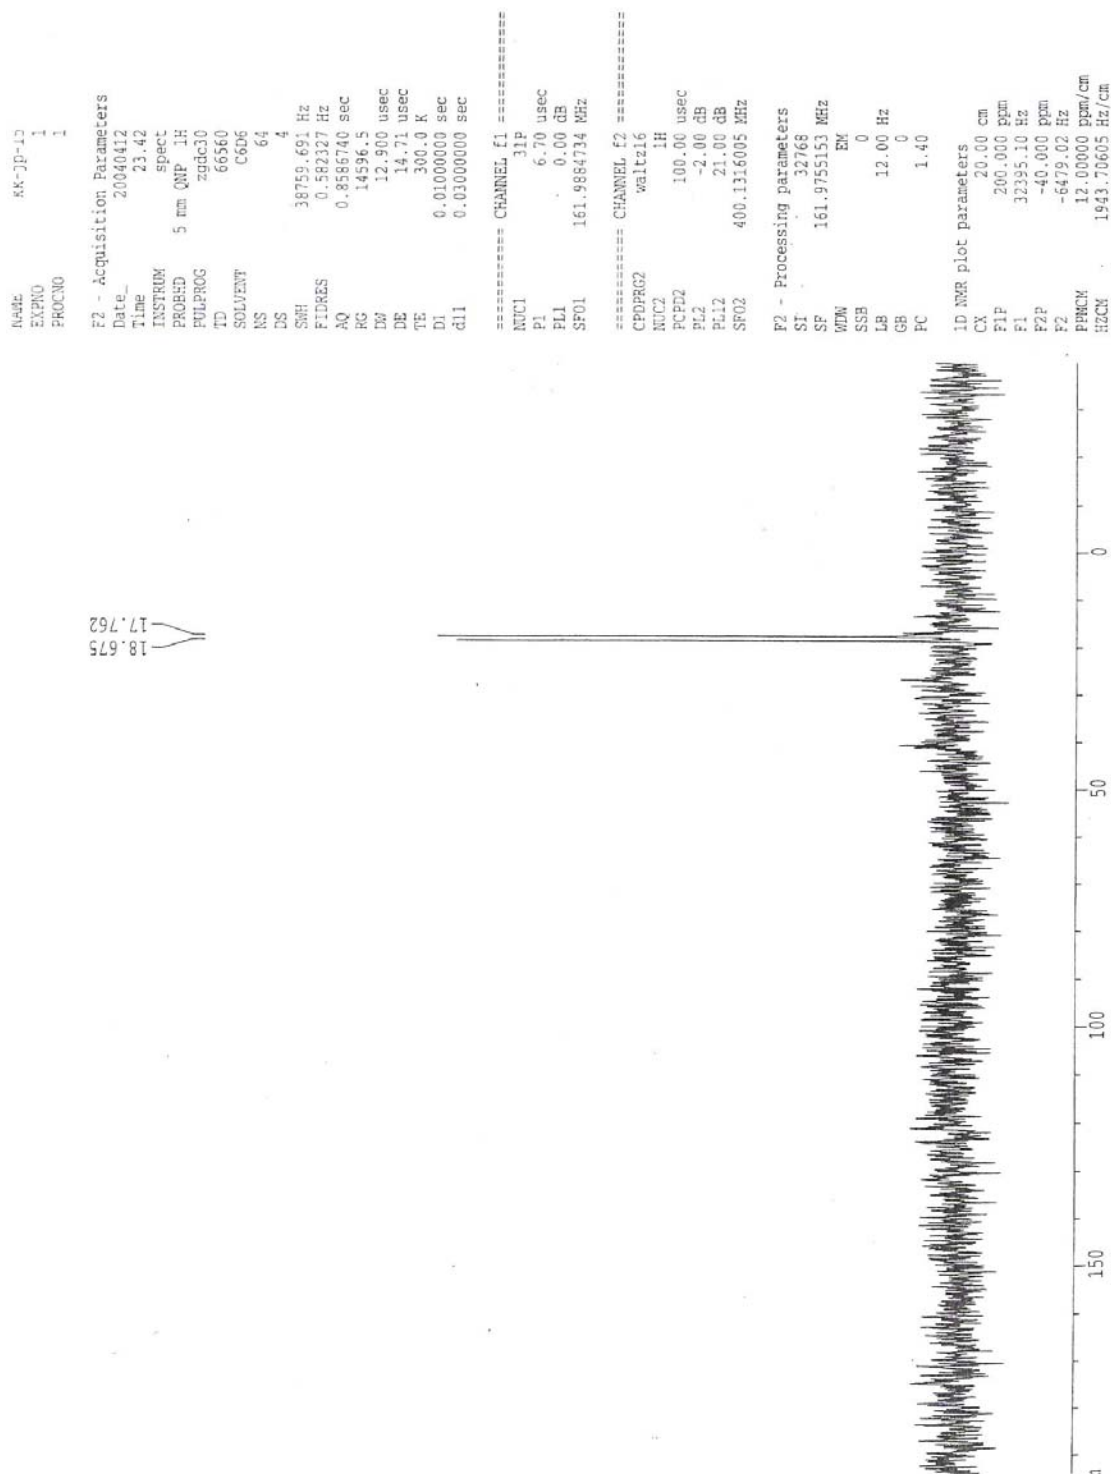

Supplementary Material for Chemical Communications  
This journal is © The Royal Society of Chemistry 2005

**Oily solid which results from concentration of a dichloromethane solution of compound 14 under reduced pressure,  $^{31}\text{P}$  NMR, 162 MHz,  $\text{CD}_2\text{Cl}_2$ .**

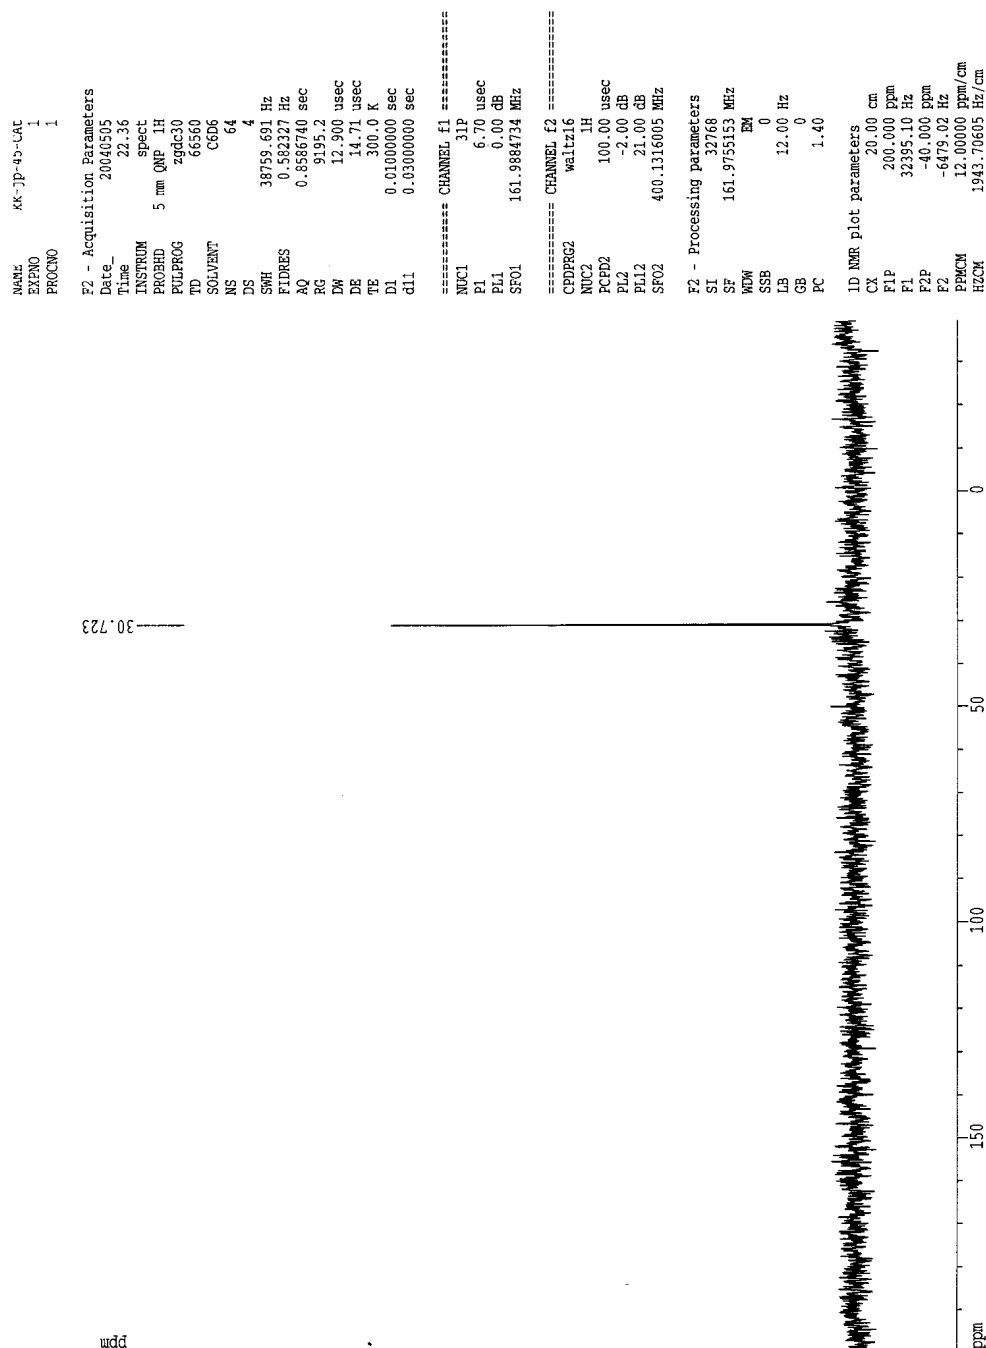



Supplementary Material for Chemical Communications  
This journal is © The Royal Society of Chemistry 2005
